# Supplementary material
Source: PubMed Central journal article supplement (PMC2943649)
Supplement: NIHMS219815-supplement-01.pdf [file NIHMS219815-supplement-01.pdf]

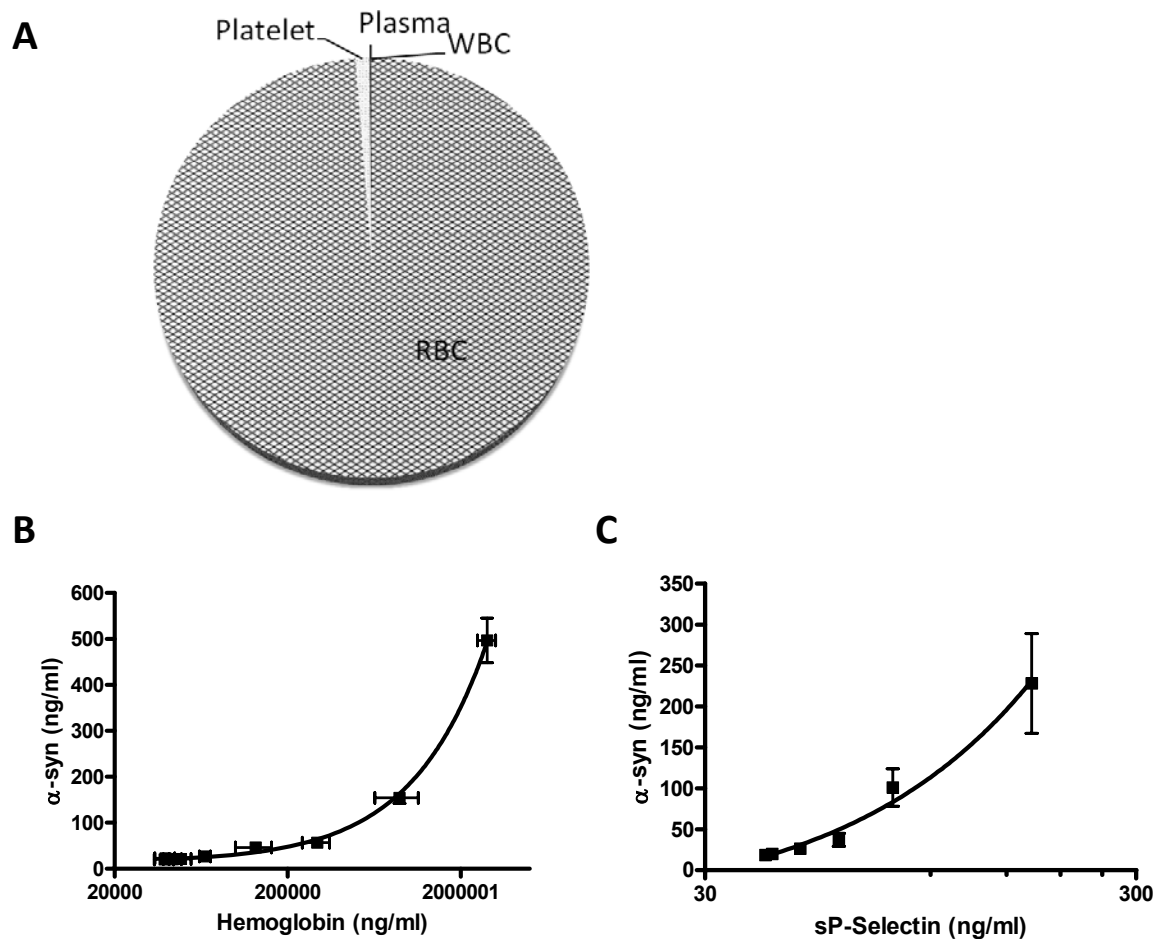

**Suppl. Fig. 1. Quantitative contribution of blood components to  $\alpha$ -synuclein levels.**

**(A)** Individual blood components were separated and purified from whole blood from seven healthy subjects, with the cell numbers counted and the  $\alpha$ -synuclein ( $\alpha$ -syn) levels determined by Luminex assays in the lysed components. The percentage contribution of each component in 1 mL of whole blood was calculated: red blood cell (RBCs) = 98.8%, platelets = 1.0%, white blood cells (WBCs) = 0.0%, platelet-free plasma = 0.2%. **(B)** Separated RBCs from five healthy individuals were lysed and spiked in platelet-free plasma in a series of dilutions respectively, and the  $\alpha$ -syn levels (shown as mean  $\pm$  S.D. of 5 subjects) were measured by Luminex, while the hemoglobin levels (shown as mean  $\pm$  S.D. of 5 subjects), as an index of hemolysis/RBC contamination, were measured using an ELISA kit. A positive correlation between hemoglobin and  $\alpha$ -syn levels was observed ( $R^2=0.999$ ,  $P<0.0001$ ). Hemoglobin at 63,900 ng/mL correlated with an  $\alpha$ -syn level that would increase plasma  $\alpha$ -syn levels by 10%. **(C)** Similarly, separated platelets were lysed and spiked in platelet-free plasma and the  $\alpha$ -syn levels were measured by Luminex, while the soluble P-selectin (sP-Selectin) levels, as an index of residual platelets, were measured using an ELISA kit. A positive correlation was also found between sP-Selectin and  $\alpha$ -syn levels ( $R^2=0.985$ ,  $P<0.0001$ ). sP-Selectin at 44.8 ng/mL represented an  $\alpha$ -syn level that would increase plasma  $\alpha$ -syn levels by 10%.

**A**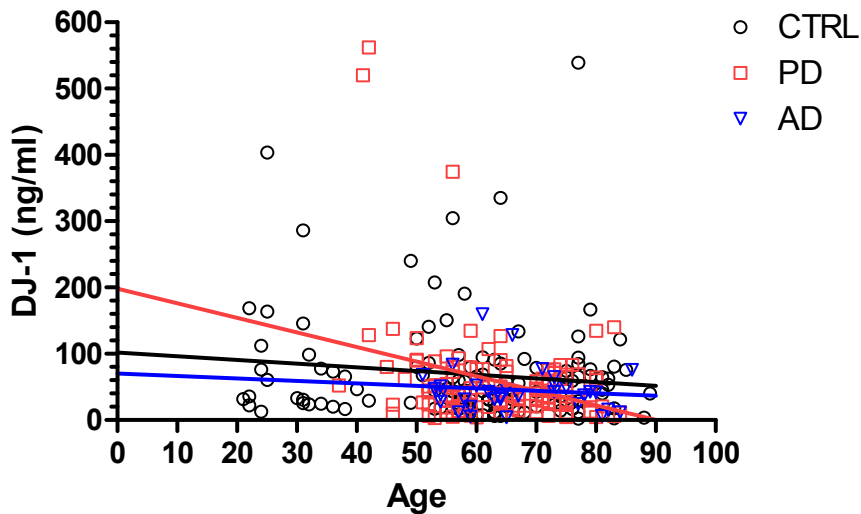**B**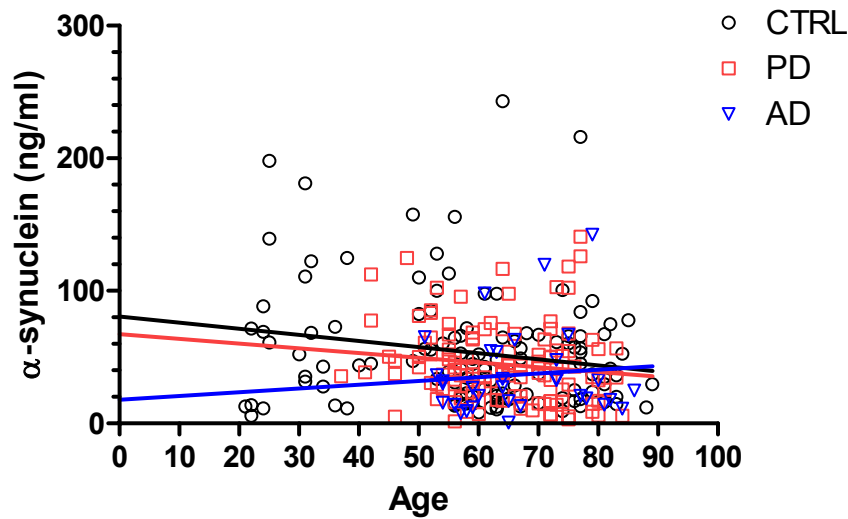

**Suppl. Fig 2. Age dependence of DJ-1 or  $\alpha$ -synuclein levels in plasma.**

Plasma DJ-1 (**A**) and  $\alpha$ -synuclein (**B**) levels were measured in individual control (CTRL), Parkinson disease (PD), and Alzheimer disease (AD) samples by Luminex. The correlation coefficient ( $R$ ) and  $P$  values of linear regression are the following: DJ-1 in CTRL,  $R^2=0.015$  ( $P=0.176$ ); DJ-1 in PD,  $R^2=0.093$  ( $P=0.0005$ ); DJ-1 in AD,  $R^2=0.013$  ( $P=0.525$ ).  $\alpha$ -synuclein in CTRL,  $R^2=0.0334$  ( $P=0.043$ );  $\alpha$ -synuclein in PD,  $R^2=0.016$  ( $P=0.158$ );  $\alpha$ -synuclein in AD,  $R^2=0.008$  ( $P=0.618$ ).

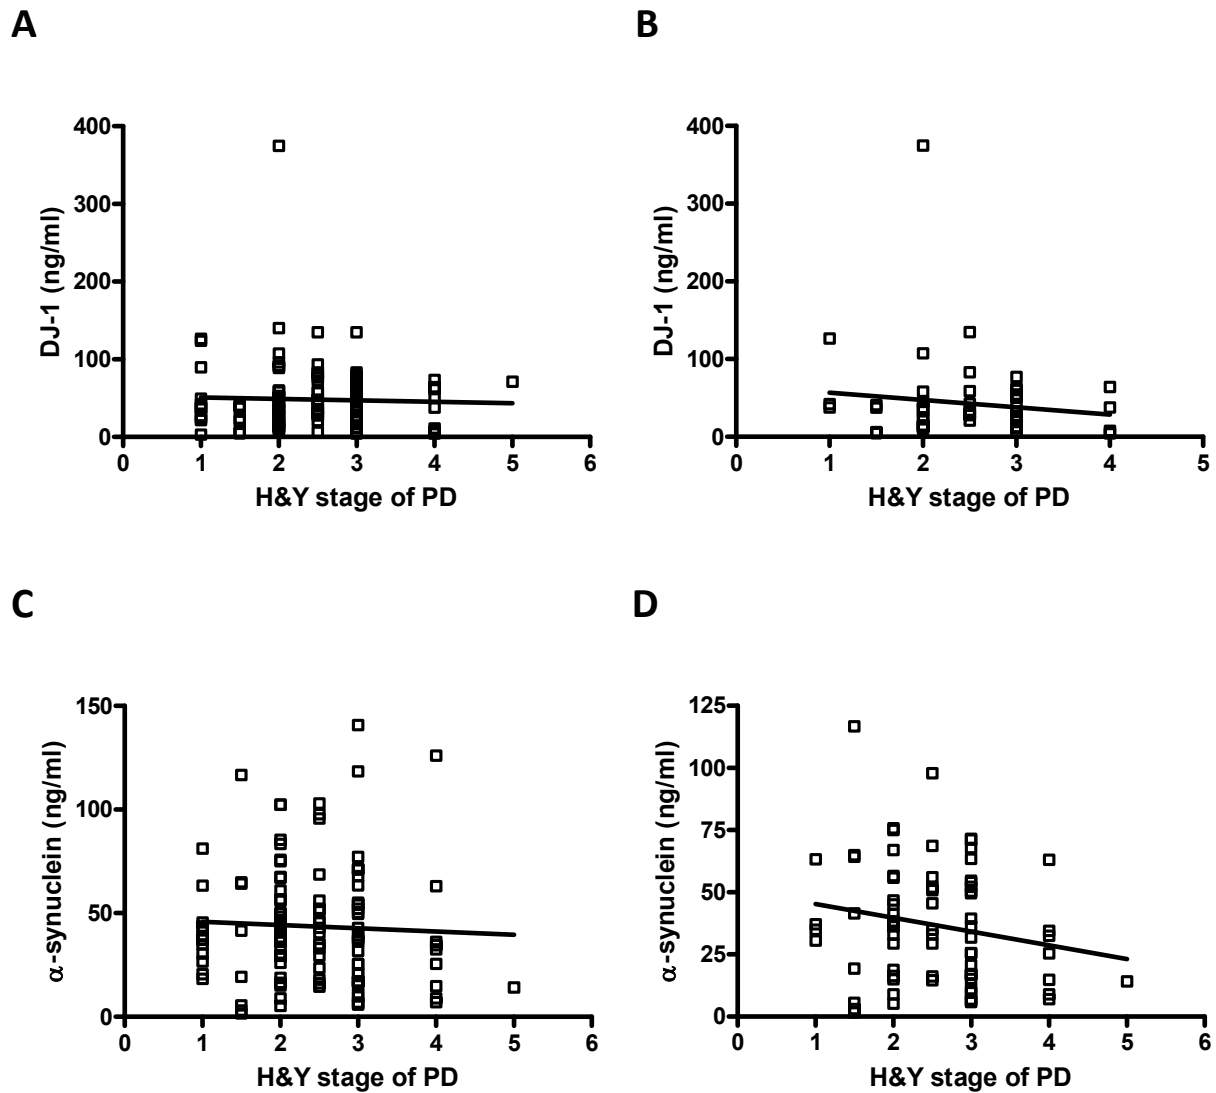

**Suppl. Fig 3. Relationship between DJ-1 or  $\alpha$ -synuclein with Parkinson disease severity.**

Plasma DJ-1 (A, B) or  $\alpha$ -synuclein (C, D) levels in Parkinson disease cases at different H&Y stages were measured by Luminex. Data shown are before (A, C) or after (B, D) elimination of cases with high hemoglobin and soluble P-selectin (sP-selectin) levels. The correlation coefficient (R) and *P* values of linear regression are the following: DJ-1,  $R^2=0.001$  ( $P=0.705$ ) and  $R^2=0.017$  ( $P=0.357$ ) for before and after eliminating cases with high HGB and sP-selectin, respectively;  $\alpha$ -synuclein,  $R^2=0.002$  ( $P=0.631$ ) and  $R^2=0.036$  ( $P=0.103$ ) for before and after eliminating cases with high HGB and sP-selectin, respectively.
